# Supplementary material for: Does the Heart Fall Asleep? – Diurnal Variations of Heart Rate Variability in Patients with Disorders of Consciousness
Source: bioRxiv or medRxiv preprint supplement (doi:10.1101/2022.02.07.22270241), 2022-02-13
Supplement: Supplementary file [file media-1.pdf]

# Does the Heart Fall Asleep? – Diurnal Variations of Heart Rate Variability in Patients with Disorders of Consciousness

Monika Angerer <sup>1,2\*</sup>, Frank H. Wilhelm <sup>3</sup>, Michael Liedlgruber <sup>3</sup>, Gerald Pichler <sup>4</sup>, Birgit Angerer <sup>5</sup>, Monika Scarpatetti <sup>4</sup>, Christine Blume <sup>6,7†</sup> and Manuel Schabus <sup>1,2†\*</sup>

<sup>1</sup> University of Salzburg; Department of Psychology; Laboratory for Sleep, Cognition and Consciousness Research; Salzburg, Austria

<sup>2</sup> University of Salzburg; Centre for Cognitive Neuroscience Salzburg (CCNS); Salzburg, Austria

<sup>3</sup> University of Salzburg; Department of Psychology; Division of Clinical Psychology and Psychopathology; Salzburg, Austria; [frank.wilhelm@plus.ac.at](mailto:frank.wilhelm@plus.ac.at) (F.W.); [michael.liedlgruber@plus.ac.at](mailto:michael.liedlgruber@plus.ac.at) (M.L.)

<sup>4</sup> Geriatric Health Care Centres of the City of Graz; Graz, Austria; [gerald.pichler@stadt.graz.at](mailto:gerald.pichler@stadt.graz.at) (G.P.); [monika.scarpatetti@stadt.graz.at](mailto:monika.scarpatetti@stadt.graz.at) (Mo.S.)

<sup>5</sup> Private Practice for General Medicine and Neurology; Leibnitz, Austria; [leibnitz@braindoc.at](mailto:leibnitz@braindoc.at)

<sup>6</sup> Centre for Chronobiology; Psychiatric Hospital of the University of Basel; Basel, Switzerland; [christine.blume@unibas.ch](mailto:christine.blume@unibas.ch)

<sup>7</sup> Transfaculty Research Platform Molecular and Cognitive Neurosciences; University of Basel; Basel, Switzerland

† Christine Blume and Manuel Schabus contributed equally to this work.

\* Correspondence: [monika.angerer@plus.ac.at](mailto:monika.angerer@plus.ac.at) (M.A.), [manuel.schabus@plus.ac.at](mailto:manuel.schabus@plus.ac.at) (Ma.S.)

## Missing Data

**Table S1.** Amount of missing data from each subject separately for time (i.e., forenoon [8am-2pm], afternoon [2pm-8pm], night [11pm-5am]).

| Patient ID | Forenoon  |            | Afternoon |            | Night     |            |
|------------|-----------|------------|-----------|------------|-----------|------------|
|            | Frequency | Percentage | Frequency | Percentage | Frequency | Percentage |
| P1         | 0         | 0          | 0         | 0          | 0         | 0          |
| P2         | 23        | 6.39       | 0         | 0          | 0         | 0          |
| P3         | 6         | 1.67       | 0         | 0          | 0         | 0          |
| P4         | 7         | 1.94       | 0         | 0          | 0         | 0          |
| P5         | 0         | 0          | 0         | 0          | 0         | 0          |
| P6         | 0         | 0          | 21        | 5.83       | 0         | 0          |
| P7         | 0         | 0          | 10        | 2.78       | 0         | 0          |
| P8         | 0         | 0          | 0         | 0          | 26        | 7.22       |
| P9         | 0         | 0          | 0         | 0          | 0         | 0          |
| P10        | 1         | 0.28       | 0         | 0          | 0         | 0          |
| P11        | 2         | 0.56       | 0         | 0          | 0         | 0          |
| P12        | 0         | 0          | 0         | 0          | 0         | 0          |
| P13        | 0         | 0          | 0         | 0          | 0         | 0          |
| P14        | 0         | 0          | 0         | 0          | 0         | 0          |
| P15        | 0         | 0          | 0         | 0          | 0         | 0          |
| P16        | 0         | 0          | 0         | 0          | 0         | 0          |
| P17        | 0         | 0          | 0         | 0          | 0         | 0          |
| P18        | 0         | 0          | 0         | 0          | 0         | 0          |
| P19        | 0         | 0          | 0         | 0          | 0         | 0          |
| P20        | 0         | 0          | 0         | 0          | 0         | 0          |
| P21        | 0         | 0          | 0         | 0          | 0         | 0          |
| P22        | 0         | 0          | 0         | 0          | 0         | 0          |
| P23        | 0         | 0          | 0         | 0          | 0         | 0          |
| P24        | 0         | 0          | 0         | 0          | 0         | 0          |
| P25        | 0         | 0          | 0         | 0          | 0         | 0          |
| P26        | 0         | 0          | 0         | 0          | 0         | 0          |

Frequency refers to the amount of one-minute segments that are missing. Percentage describes the amount of missing one-minute segments in its relation to the total file length of six hours (i.e., 360 one-minute segments). Missing data is highlighted in grey.

## Normality Test Results

**Table S2.** Shapiro-Wilk tests ( $p$ -values) for normality for each variable separately for time (i.e., forenoon [8am-2pm], afternoon [2pm-8pm], night [11pm-5am]).

| Variable            | Forenoon | Afternoon | Night |
|---------------------|----------|-----------|-------|
| Interbeat interval  | .436     | .551      | .729  |
| Heart rate          | .054     | .061      | .025  |
| RMSSD               | .013     | .003      | .194  |
| Very low frequency  | .012     | .075      | .281  |
| Low frequency       | .005     | .017      | .497  |
| High frequency      | .001     | .008      | .004  |
| Approximate entropy | .907     | .162      | .193  |

|                                    |        |      |        |        |
|------------------------------------|--------|------|--------|--------|
| DfaAlpha                           |        | .067 | .002   | .352   |
| Hurst exponent                     |        | .162 | .056   | .061   |
| Sample entropy 1                   |        | .001 | < .001 | < .001 |
| Sample entropy 2                   |        | .212 | .703   | .469   |
| Sample entropy 3                   |        | .054 | .693   | .603   |
| Sample entropy 4                   |        | .092 | .687   | .705   |
| Sample entropy 5                   |        | .079 | .652   | .916   |
| EEG permutation entropy            |        |      | .219   | .681   |
| CRS-R sum score                    | < .001 |      |        |        |
| CRS-R auditory subscale score      | < .001 |      |        |        |
| CRS-R visual subscale score        | < .001 |      |        |        |
| CRS-R motor subscale score         | < .001 |      |        |        |
| CRS-R oroverbal subscale score     | < .001 |      |        |        |
| CRS-R communication subscale score | < .001 |      |        |        |
| CRS-R arousal subscale score       | < .001 |      |        |        |
| Age                                | < .001 |      |        |        |
| Time since injury                  | < .001 |      |        |        |

*P*-values for EEG permutation entropy refer to day (i.e., 8am-8pm) and night (i.e., 11pm-5am). *P*-values for CRS-R scores, age and time since injury refer to all time conditions (i.e., forenoon, afternoon, and night). Significant *p*-values (i.e.  $p < .05$ ), which indicate that the data is not normal distributed, are marked in grey. Abbreviations: RMSSD = root mean square of successive differences between adjacent heartbeats, DfaAlpha = detrended fluctuation analysis scaling exponent.

## Results

### Heart Rate

Analyses of the heart rate (HR) of 26 patients revealed a trend towards a main effect for *time* ( $F_{WTS}(2)=7.28$ ,  $p=.053$ ) and a significant effect for *diagnosis* ( $F_{WTS}(1)=5.1$ ,  $p=.039$ ), but no significant *time*  $\times$  *diagnosis* interaction ( $F_{WTS}(2)=1.42$ ,  $p=.515$ ). Specifically, patients showed a lower HR during night as compared to forenoon ( $F_{WTS}(1)=8.26$ ,  $p=.021$ ) and afternoon ( $F_{WTS}(1)=6.64$ ,  $p=.024$ ). No differences could be observed in the patients' HR between fore- and afternoon ( $F_{WTS}(1)=0.002$ ,  $p=.967$ ; cf. *Figure S1a*). Further, patients with UWS showed a lower HR as compared to patients with (E)MCS ( $F_{WTS}(1)=5.1$ ,  $p=.039$ ; cf. *Figure S1b*). This effect was also visible when correlating HR and CRS-R sum scores of 25 patients, showing that lower CRS-R sum scores were associated with lower HR during forenoon ( $r\tau(23)=0.34$ ,  $p=.02$ ; cf. *Figure S2a*), afternoon ( $r\tau(23)=0.38$ ,  $p=.009$ ; cf. *Figure S2b*) and night ( $r\tau(23)=0.28$ ,  $p=.056$ ;  $b=1.41$ , 95% CI = [0.10, 2.72]; cf. *Figure S2c*).

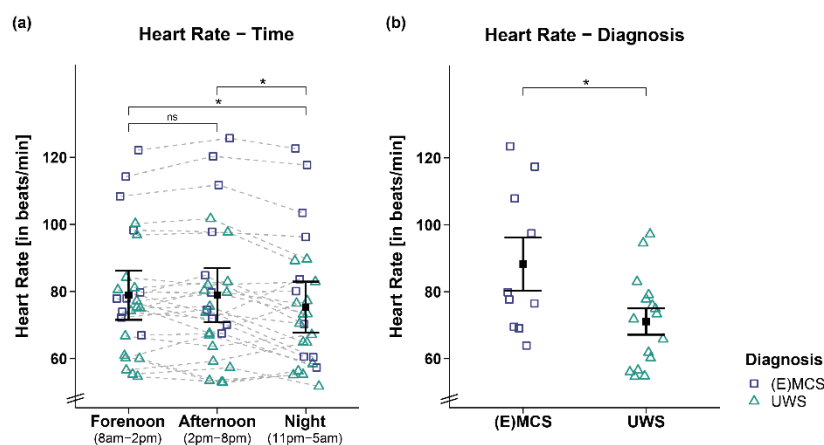

**Figure S1.** Heart rate (HR) separately for time and diagnosis contrasts. **(a)** While patients' HR was lower during the night as compared to the day (i.e., forenoon, afternoon), it did not differ between fore- and afternoon. **(b)** Patients with UWS showed a lower HR than patients with (E)MCS. Error bars represent the mean and 95% confidence

interval. \* $p < .05$ , ns = not significant. Abbreviations: (E)MCS = (emergence from) minimally conscious state, UWS = unresponsive wakefulness syndrome, beats/min = heartbeats per minute.

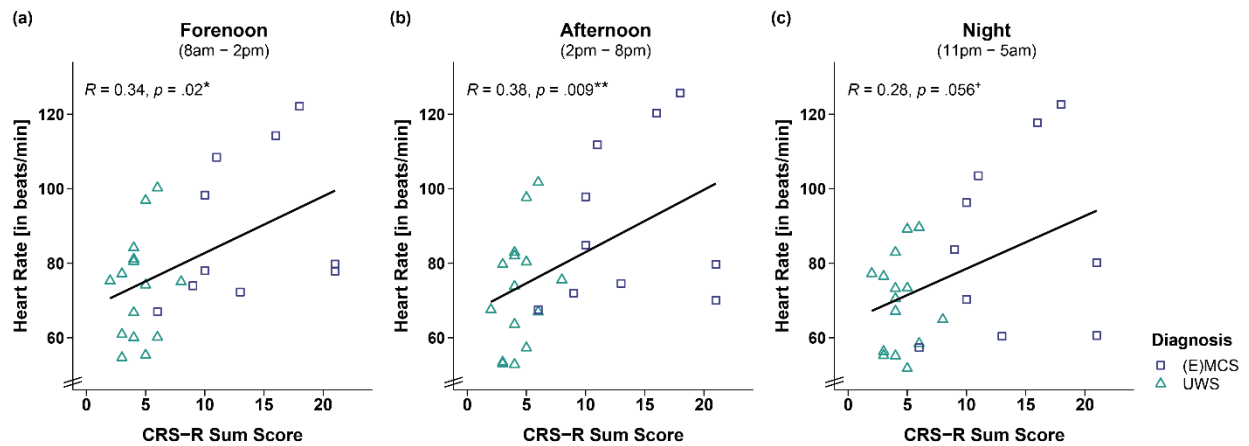

**Figure S2. Correlation between heart rate (HR) and CRS-R sum score separately for time.** A higher HR was associated with a higher CRS-R sum score throughout the (a, b) day (i.e., forenoon, afternoon) and (c) night. \*\* $p < .01$ , \* $p < .05$ , \* $p \leq .1$ . Abbreviations: (E)MCS = (emergence from) minimally conscious state, UWS = unresponsive wakefulness syndrome, beats/min = heartbeats per minute.

### Etiology

**Table S3.** Wald-type statistic (WTS) of the different HRV parameters separately for the main effects ‘time’ (i.e., forenoon [8am-2pm], afternoon [2pm-8pm], night [11pm-5am]) and ‘etiology’ (i.e., traumatic vs. non-traumatic brain injury), and the ‘time × etiology’ interaction ( $N=26$ ).

| Variable            | Time                       | Etiology                  | Time × Etiology           |
|---------------------|----------------------------|---------------------------|---------------------------|
| Interbeat interval  | $F_{WTS}(2)=7.37, p=.050$  | $F_{WTS}(1)=0.08, p=.778$ | $F_{WTS}(2)=5.58, p=.088$ |
| Heart rate          | $F_{WTS}(2)=7.82, p=.041$  | $F_{WTS}(1)=0.00, p=.949$ | $F_{WTS}(2)=3.33, p=.220$ |
| RMSSD               | $F_{WTS}(2)=0.50, p=.789$  | $F_{WTS}(1)=0.00, p=.961$ | $F_{WTS}(2)=1.51, p=.502$ |
| Very low frequency  | $F_{WTS}(2)=7.47, p=.046$  | $F_{WTS}(1)=0.22, p=.648$ | $F_{WTS}(2)=2.19, p=.368$ |
| Low frequency       | $F_{WTS}(2)=6.59, p=.065$  | $F_{WTS}(1)=0.02, p=.893$ | $F_{WTS}(2)=2.90, p=.268$ |
| High frequency      | $F_{WTS}(2)=4.08, p=.178$  | $F_{WTS}(1)=0.24, p=.619$ | $F_{WTS}(2)=2.16, p=.382$ |
| Approximate entropy | $F_{WTS}(2)=20.74, p=.001$ | $F_{WTS}(1)=0.30, p=.575$ | $F_{WTS}(2)=2.90, p=.277$ |
| DfaAlpha            | $F_{WTS}(2)=0.44, p=.816$  | $F_{WTS}(1)=4.59, p=.043$ | $F_{WTS}(2)=1.29, p=.552$ |
| Hurst exponent      | $F_{WTS}(2)=2.36, p=.335$  | $F_{WTS}(1)=0.09, p=.772$ | $F_{WTS}(2)=2.01, p=.400$ |
| Sample entropy 1    | $F_{WTS}(2)=0.41, p=.830$  | $F_{WTS}(1)=4.36, p=.049$ | $F_{WTS}(2)=1.22, p=.579$ |
| Sample entropy 2    | $F_{WTS}(2)=3.79, p=.193$  | $F_{WTS}(1)=0.51, p=.477$ | $F_{WTS}(2)=2.04, p=.396$ |
| Sample entropy 3    | $F_{WTS}(2)=3.4, p=.226$   | $F_{WTS}(1)=1.03, p=.316$ | $F_{WTS}(2)=1.34, p=.543$ |
| Sample entropy 4    | $F_{WTS}(2)=3.26, p=.239$  | $F_{WTS}(1)=1.07, p=.304$ | $F_{WTS}(2)=0.68, p=.734$ |
| Sample entropy 5    | $F_{WTS}(2)=2.43, p=.338$  | $F_{WTS}(1)=1.09, p=.300$ | $F_{WTS}(2)=0.78, p=.701$ |

Significant  $p$ -values (i.e.  $p < .05$ ) are marked in grey. Abbreviations: RMSSD = root mean square of successive differences between adjacent heartbeats, DfaAlpha = detrended fluctuation analysis scaling exponent.

### Sex

**Table S4.** Wald-type statistic (WTS) of the different HRV parameters separately for the main effects ‘time’ (i.e., forenoon [8am-2pm], afternoon [2pm-8pm], night [11pm-5am]), ‘sex’ (i.e., male vs. female), and the ‘time × sex’ interaction ( $N=26$ ).

| Variable           | Time                      | Sex                       | Time × Sex                |
|--------------------|---------------------------|---------------------------|---------------------------|
| Interbeat interval | $F_{WTS}(2)=4.66, p=.156$ | $F_{WTS}(1)=2.36, p=.143$ | $F_{WTS}(2)=3.89, p=.205$ |

|                     |                            |                           |                           |
|---------------------|----------------------------|---------------------------|---------------------------|
| Heart rate          | $F_{WTS}(2)=6.06, p=.099$  | $F_{WTS}(1)=1.96, p=.176$ | $F_{WTS}(2)=3.82, p=.217$ |
| RMSSD               | $F_{WTS}(2)=0.18, p=.920$  | $F_{WTS}(1)=0.44, p=.514$ | $F_{WTS}(2)=1.41, p=.547$ |
| Very low frequency  | $F_{WTS}(2)=12.21, p=.014$ | $F_{WTS}(1)=0.09, p=.773$ | $F_{WTS}(2)=0.11, p=.950$ |
| Low frequency       | $F_{WTS}(2)=12.08, p=.015$ | $F_{WTS}(1)=0.53, p=.478$ | $F_{WTS}(2)=0.05, p=.977$ |
| High frequency      | $F_{WTS}(2)=1.1, p=.622$   | $F_{WTS}(1)=1.45, p=.242$ | $F_{WTS}(2)=1.82, p=.310$ |
| Approximate entropy | $F_{WTS}(2)=22.29, p=.002$ | $F_{WTS}(1)=0.26, p=.607$ | $F_{WTS}(2)=2.27, p=.383$ |
| DfaAlpha            | $F_{WTS}(2)=0.05, p=.975$  | $F_{WTS}(1)=3.92, p=.062$ | $F_{WTS}(2)=4.89, p=.135$ |
| Hurst exponent      | $F_{WTS}(2)=1.59, p=.495$  | $F_{WTS}(1)=0.45, p=.507$ | $F_{WTS}(2)=8.47, p=.044$ |
| Sample entropy 1    | $F_{WTS}(2)=0.3, p=.883$   | $F_{WTS}(1)=1.45, p=.253$ | $F_{WTS}(2)=2.78, p=.325$ |
| Sample entropy 2    | $F_{WTS}(2)=4.51, p=.159$  | $F_{WTS}(1)=0.00, p=.985$ | $F_{WTS}(2)=2.17, p=.394$ |
| Sample entropy 3    | $F_{WTS}(2)=3.57, p=.229$  | $F_{WTS}(1)=0.04, p=.858$ | $F_{WTS}(2)=1.89, p=.443$ |
| Sample entropy 4    | $F_{WTS}(2)=3.19, p=.268$  | $F_{WTS}(1)=0.05, p=.824$ | $F_{WTS}(2)=1.41, p=.537$ |
| Sample entropy 5    | $F_{WTS}(2)=2.01, p=.428$  | $F_{WTS}(1)=0.08, p=.792$ | $F_{WTS}(2)=1.39, p=.541$ |

Abbreviations: RMSSD = root mean square of successive differences between adjacent heartbeats, DfaAlpha = detrended fluctuation analysis scaling exponent.

### Entropy Parameters

**Table S5.** Wald-type statistic (WTS) of the different entropy parameters separately for the main effects ‘time’ (i.e., forenoon [8am-2pm], afternoon [2pm-8pm], night [11pm-5am]) and ‘diagnosis’ (i.e., E/MCS vs. UWS), and the ‘time × diagnosis’ interaction ( $N=26$ ).

| Variable         | Time                      | Diagnosis                 | Time × Diagnosis          |
|------------------|---------------------------|---------------------------|---------------------------|
| DfaAlpha         | $F_{WTS}(2)=0.48, p=.807$ | $F_{WTS}(1)=1.53, p=.228$ | $F_{WTS}(2)=0.71, p=.721$ |
| Hurst exponent   | $F_{WTS}(2)=3.05, p=.257$ | $F_{WTS}(1)=0.22, p=.646$ | $F_{WTS}(2)=1.08, p=.604$ |
| Sample entropy 1 | $F_{WTS}(2)=0.40, p=.841$ | $F_{WTS}(1)=0.44, p=.518$ | $F_{WTS}(2)=0.24, p=.901$ |
| Sample entropy 2 | $F_{WTS}(2)=4.27, p=.161$ | $F_{WTS}(1)=0.07, p=.791$ | $F_{WTS}(2)=0.05, p=.980$ |
| Sample entropy 3 | $F_{WTS}(2)=3.97, p=.178$ | $F_{WTS}(1)=0.01, p=.941$ | $F_{WTS}(2)=0.06, p=.972$ |
| Sample entropy 4 | $F_{WTS}(2)=3.71, p=.197$ | $F_{WTS}(1)=0.12, p=.737$ | $F_{WTS}(2)=0.09, p=.958$ |
| Sample entropy 5 | $F_{WTS}(2)=2.93, p=.271$ | $F_{WTS}(1)=0.21, p=.650$ | $F_{WTS}(2)=0.01, p=.996$ |

Abbreviation: DfaAlpha = detrended fluctuation analysis scaling exponent.

### EEG Entropy

Analyses of the EEG permutation entropy (PE) of 14 patients revealed a significant main effect for *time* ( $F_{WTS}(2)=9.79, p=.011$ ) with patients showing higher PE during the day (i.e., 8am-8pm) as compared to the night (i.e., 11pm-5am), and a significant *time × diagnosis* interaction ( $F_{WTS}(2)=5.39, p=.041$ ), but no significant main effect for *diagnosis* ( $F_{WTS}(1)=0.12, p=.733$ ). Specifically, while patients with (E)MCS showed a lower PE during the night than during the day ( $F_{WTS}(1)=21.87, p=.002$ ), no such day-night difference was observed in patients with UWS ( $F_{WTS}(1)=0.25, p=.631$ ). This has already been shown in [25]. We ran the analyses again as we only use a subsample of the dataset here.
